# Supplementary material for: High-performance non-enzymatic biofuel cells based on an organic copper complex cathode and a nanoporous gold nanoparticle anode
Source: Royal Society of Chemistry journal article supplement (doi:10.1039/c8cc09333d), 2018-12-11
Supplement: c8cc09333d1.pdf [file c8cc09333d1.pdf]

## Supporting Information

### **High-Performance Non-Enzymatic Biofuel Cells Based on Organic Copper Complex Cathode and Nanoporous Gold Nanoparticles Anode**

Shifan Zhao, Panpan Gai\*, Wen Yu, Haiyin Li, and Feng Li\*

College of Chemistry and Pharmaceutical Sciences, Qingdao Agricultural University

Qingdao 266109, People's Republic of China

\*Corresponding authors

Tel/Fax: 86-532-86080855; E-mail: lifeng@qau.edu.cn

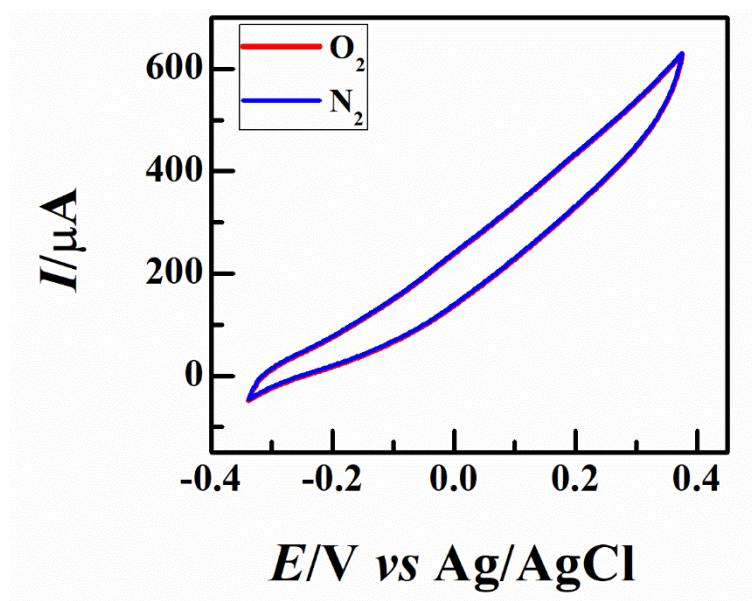

**Fig. S1** CVs of NPG modified anode in 0.1 M PB (pH 7.4) with glucose in  $\text{N}_2$ -saturated (a) and  $\text{O}_2$ -saturated (b) conditions.

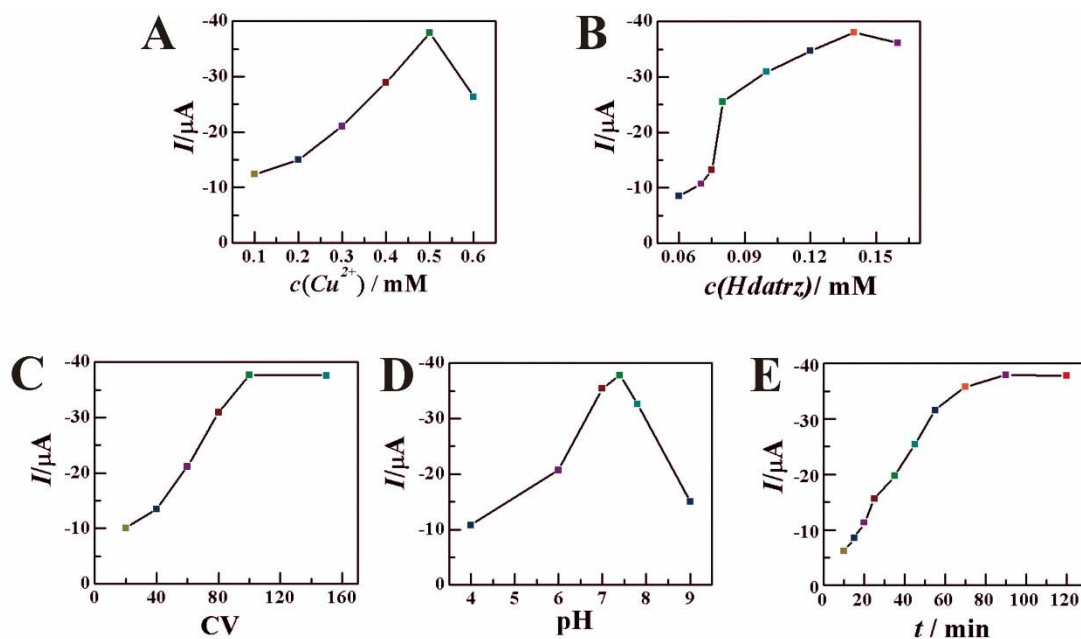

**Fig. S2** (A) The relationship between the cathodic current and the different  $\text{Cu}^{2+}$  concentration (B) The relationship between the cathodic current and the different concentration of Hdatrz (C) The relationship between the cathodic current and the different number of CV circulation for the electroreduction of Hdatrz. (D) The relationship between the cathodic current and the different pH. (E) The relationship between the cathodic current and the different coordination time for  $\text{Cu}^{2+}$  with Hdatrz. The electrolyte solution was 0.1 M PB (pH=7.4) saturated with  $\text{N}_2$ .

As the above described, the  $\text{O}_2$  reduction performance was mainly origin from the electrocatalytic activity of  $[\text{Cu}(\text{Hdatrz})]$  complex. Therefore, a series of CVs were performed to explore the  $\text{Cu}^{\text{II}}/\text{Cu}^{\text{I}}$  redox peak for  $[\text{Cu}(\text{Hdatrz})]$  complex under different conditions. As shown in Figure S2A, the amount of  $\text{Cu}^{2+}$  would directly affect the electrocatalytic activity. The Hdatrz modified ITO electrode would continually capture free  $\text{Cu}^{2+}$  until saturation. And the maximum redox peak was achieved at the  $\text{Cu}^{2+}$  concentration of 0.5 mM. However, the excessive  $\text{Cu}^{2+}$  would increase the amount of  $\text{Cu}^{\text{II}}$ -complex intermediate, thus a drop of redox peak for  $[\text{Cu}(\text{Hdatrz})]$  complex itself could be observed. Therefore, 0.5 mM  $\text{Cu}^{2+}$  was used for the complexation with Hdatrz in this work. Figure S2B showed the effects of Hdatrz with different concentration on the electrocatalytic activity. The redox peak current increased quickly as the Hdatrz concentration varied from 0.08 to 0.12 mM, and presented a slight increase when the concentration of Hdatrz gradually reached the saturated state, thus 0.16 mM Hdatrz was used as the optimal condition.

Furthermore, different number of CV circulation for the electrografted Hdatrz played a crucial role in the stability of the catalytic performance. As shown in Figure S2C, initially, the redox peak current enhanced with the increase of CV circulation, because Hdatrz was gradually electrografted onto the surface of ITO electrode. When the number of CV circulation exceeded 100, the redox peak current remained unchanged, suggesting that the electrode surface has been occupied completely by Hdatrz. In order to ensure the optimal effect, 100 of CV circulation was chosen for this experiment. Certainly, the pH value of  $\text{Cu}^{2+}$  solution was another factor for the complexation between  $\text{Cu}^{2+}$  and Hdatrz. As indicated from Figure S2D, the maximum redox peak current appeared at pH 7.4, same as the physiological solution. Notably, an obvious decline of the current was observed when the pH changed from 8 to 9. The reason might be more  $[\text{OH}^-]$  anions could significantly affect the  $[\text{Cu}(\text{Hdatrz})]$  complex. Hence, pH 7.4 was used as the optimal pH of  $\text{Cu}^{2+}$  solution during the process of soaking. In addition, Figure S1E illustrated the effects of different soaking times on redox peak current of  $\text{Cu}^{\text{II}}/\text{Cu}^{\text{I}}$ . The current reached a plateau at 90 min, indicating a complete complexation between  $\text{Cu}^{2+}$  and Hdatrz. So, 90 min was used as the optimal soaking time.

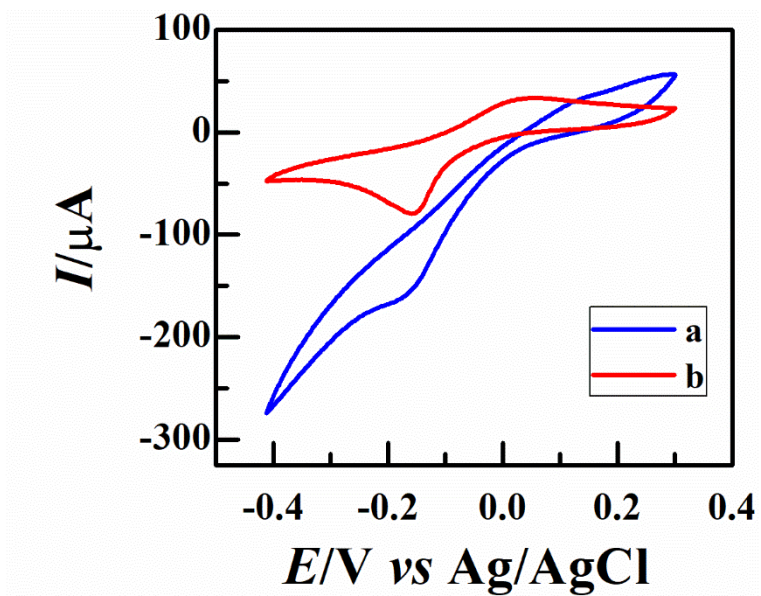

**Fig. S3** Cyclic voltammetry analysis of the cathode in 0.10 M PB (pH 7.4) within  $\text{O}_2$ -saturated conditions in the absence (a) and presence of PPI (b).

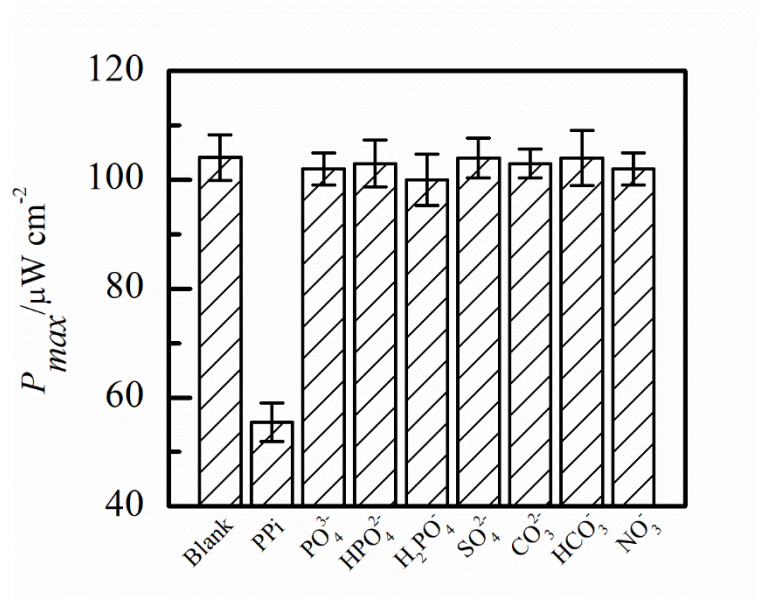

**Fig. S4.**  $P_{max}$  of the as-proposed biosensor for various anions at 0.1 nM concentration

**Table S1** Comparison of the performance of NEFC by our method and those reported in literatures

| Anodic material                                                    | Cathodic material                                                  | $E^{OCV}$<br>(V) | $P_{max}$<br>( $\mu\text{W cm}^{-2}$ ) | Electrolyte      | Ref.      |
|--------------------------------------------------------------------|--------------------------------------------------------------------|------------------|----------------------------------------|------------------|-----------|
| MWCNT/(DPDE)Rh(III)                                                | MWCNT/phthalocyaninecobalt(II)                                     | 0.64             | 0.18                                   | 0.5 M KOH        | 1         |
| Nickeloxide-decorated graphene nanosheet (NiO/GNS)                 | Pt/C                                                               | 0.75             | No studied                             | 0.1 M KOH        | 2         |
| Nitrogen-doped graphene decorating Co nanoparticle hybrids (Co/NG) | Nitrogen-doped graphene decorating Co nanoparticle hybrids (Co/NG) | 0.79             | 150.00                                 | 0.1 M KOH        | 3         |
| Sn:Co <sub>3</sub> O <sub>4</sub>                                  | Pt/C                                                               | Not studied      | 30.0                                   | 0.1 M KOH        | 4         |
| Raney-platinum film                                                | Raney-platinum film                                                | 0.50             | 4.40                                   | PBS              | 5         |
| Au nanowire (AuNW)                                                 | N-doped mesoporous carbon (N-m-C)                                  | 0.52             | 64.30                                  | pH 7.4 PBS       | 6         |
| Porous palladium                                                   | Porous palladium                                                   | 0.65             | 5.70                                   | pH 7.4 0.1 M PBS | 7         |
| NPG                                                                | [Cu (Hdatrz)]                                                      | 0.81             | 104                                    | pH 7.4 0.1 M PB  | This work |

**Table S2.** Comparison of analytical performance for PPI assay by our method and those reported in literature

| Method                 | Strategy                                                                      | LOD(M)                | Dynamic range(M)                             | Ref.      |
|------------------------|-------------------------------------------------------------------------------|-----------------------|----------------------------------------------|-----------|
| Fluorescence           | DNA scaffolded silver nanoclusters                                            | $1.1 \times 10^{-7}$  | $0.2 \times 10^{-6}$ - $1.0 \times 10^{-4}$  | 8         |
| UV-vis spectrum        | competitive coordination chemistry                                            | $2.4 \times 10^{-5}$  | $1.3 \times 10^{-7}$ - $1.3 \times 10^{-3}$  | 9         |
| Fluorescent            | Conjugated Polymers                                                           | $1.0 \times 10^{-6}$  | $5.0 \times 10^{-6}$ - $2.4 \times 10^{-5}$  | 10        |
| Near-IR Fluorescence   | Gold nanorod @SiO <sub>2</sub> @ meso-tetra(4-carboxyphenyl) porphyrin (TCPP) | $8.2 \times 10^{-7}$  | $5.0 \times 10^{-6}$ - $7.5 \times 10^{-5}$  | 11        |
| Fluorescence           | single-stranded-DNA-Al(III) complex system                                    | $4.0 \times 10^{-8}$  | $4.0 \times 10^{-8}$ - $4.0 \times 10^{-5}$  | 12        |
| Self-powered biosensor | NEFC                                                                          | $2.0 \times 10^{-12}$ | $1.0 \times 10^{-11}$ - $1.0 \times 10^{-8}$ | This Work |



## References

1. K. Elouarzaki, G. A. Le, M. Holzinger, J. Thery and S. Cosnier, *J. Am. Chem. Soc.*, 2012, **134**, 14078-14085.
2. G. Zeng, W. Li, S. Ci, J. Jia and Z. Wen, *Sci. Rep.*, 2016, **6**, 36454.
3. S. Ci, Z. Wen, S. Mao, Y. Hou, S. Cui, Z. He and J. Chen, *Chem. Commun.*, 2015, **51**, 9354-9357.
4. M. Chowdhury, C. Ossinga, F. Cummings, J. Chamier and M. Kebede, *Electroanalysis*, 2017, **27**, 1-12.
5. S. Kerzenmacher, U. Kräling, T. Metz, R. Zengerle and F. V. Stetten, *J. Power Sources*, 2011, **196**, 1264-1272.
6. M. Chu, Y. Zhang, L. Yang, Y. Tan, W. Deng, M. Ma, X. Su, Q. Xie and S. Yao, *Energy Environ. Sci.*, 2013, **6**, 3600-3604.
7. Z. Yue, L. Z. Fan, H. Bo, Z. Yang, M. S. Zhang, Q. M. Que and J. Y. Ji, *Energy Technol.*, 2016, **4**, 249-255.
8. J. L. Ma, B. C. Yin, X. Wu and B. C. Ye, *Anal. Chem.*, 2016, **88**, 9219-9225.
9. J. Deng, P. Yu, L. Yang and L. Mao, *Anal. Chem.*, 2013, **85**, 2516-2522.
10. Y. Bao, H. Wang, Q. Li, B. Liu, Q. Li, W. Bai, B. Jin and R. Bai, *Macromolecules.*, 2012, **45**, 3394-3401.
11. L. Wang, Q. Song, Q. Liu, D. He and J. Ouyang, *Adv. Funct. Mater.*, 2015, **25**, 7017-7027.
12. X. Su, C. Zhang, X. Xiao, A. Xu, Z. Xu and M. Zhao, *Chem. Commun.*, 2013, **49**, 798-800.
